# Supplementary material for: Synthesis, characterization and photocatalytic activity of magnetically separable hexagonal Ni/ZnO nanostructure
Source: Royal Society of Chemistry journal article supplement (doi:10.1039/c2nr31831h), 2012-01-01
Supplement: c2nr31831h.pdf [file c2nr31831h.pdf]

# Synthesis, Characterization and Photocatalytic Activity of Magnetically Separable Hexagonal Ni/ZnO Nanostructure

Samarpita Senapati,<sup>a</sup> Suneel K. Srivastava<sup>a,\*</sup> and Shiv B. Singh<sup>b</sup>

<sup>a</sup>Department of Chemistry, Indian Institute of Technology Kharagpur, India

<sup>b</sup>Department of Metallurgical and Materials Engineering, Indian Institute of  
Technology Kharagpur, India

## Caption to the Electronic Supplementary Information

**Fig. S1** Ni/ZnO hybrid nanostructure prepared using (A) 0.195 and (B) 0.25 M  $[\text{Zn}^{2+}]$  at 90 ° C.

**Fig. S2** FTIR spectra nickel nanoparticles prepared at 140 °C (a), and Ni/ZnO hybrid  
nanostructure prepared using (b) 0.063, (c) 0.125, (d) 0.195 and (e) 0.25 M  $[\text{Zn}^{2+}]$ .

**Fig. S3** Raman spectra of Ni/ZnO nanostructure prepared using (a) 0.063, (b) 0.125, (c) 0.195 and  
(d) 0.25 M  $[\text{Zn}^{2+}]$ .

**Fig S4** Room temperature PL spectra of (a) ZnO and (b) Ni/ZnO nanostructure prepared  
using 0.25 M  $[\text{Zn}^{2+}]$ .

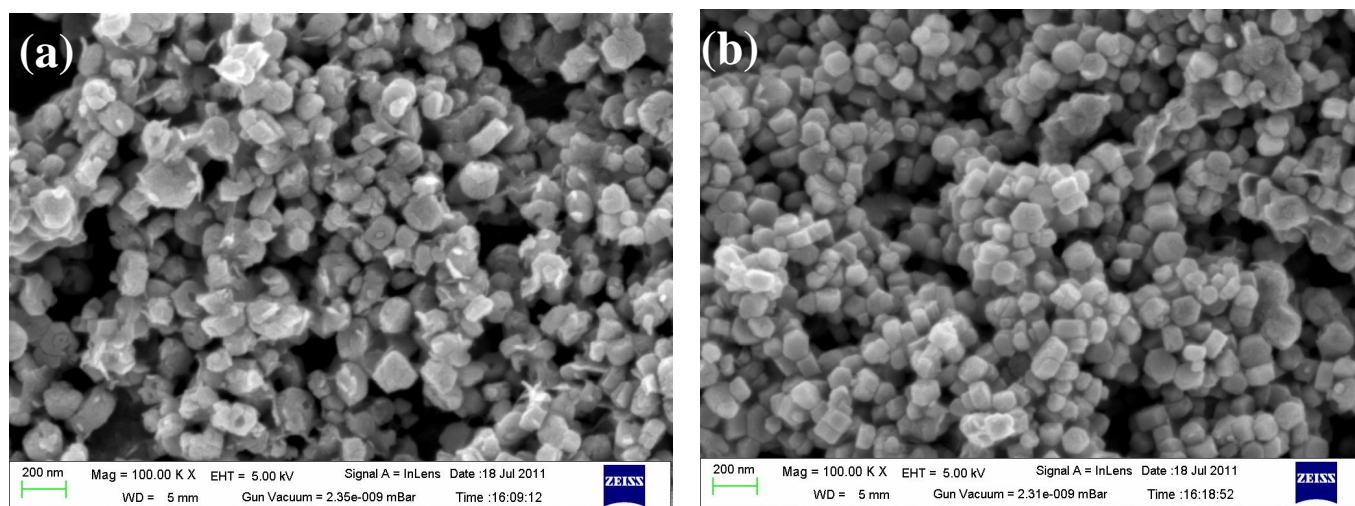

**Fig. S1** Ni/ZnO hybrid nanostructure prepared using (A) 0.195 and (B) 0.25 M  $[\text{Zn}^{2+}]$  at 90 ° C.

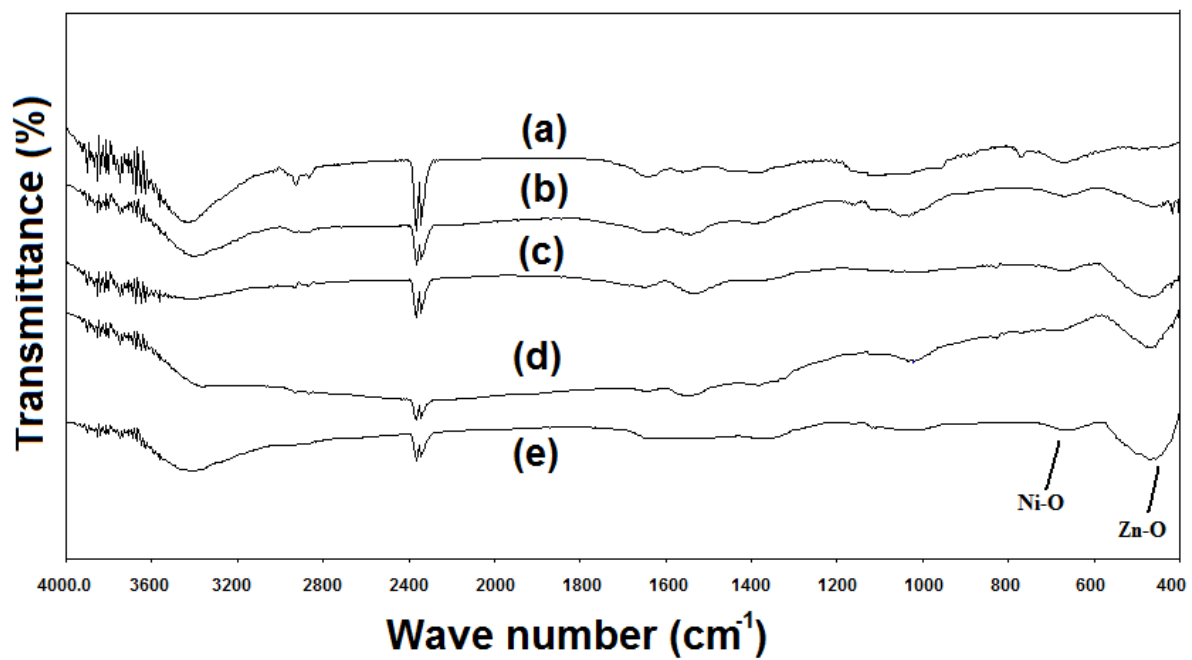

**Fig. S2** FTIR spectra nickel nanoparticles prepared at 140 °C (a), and Ni/ZnO hybrid nanostructure prepared using (b) 0.063, (c) 0.125, (d) 0.195 and (e) 0.25 M [Zn<sup>2+</sup>].

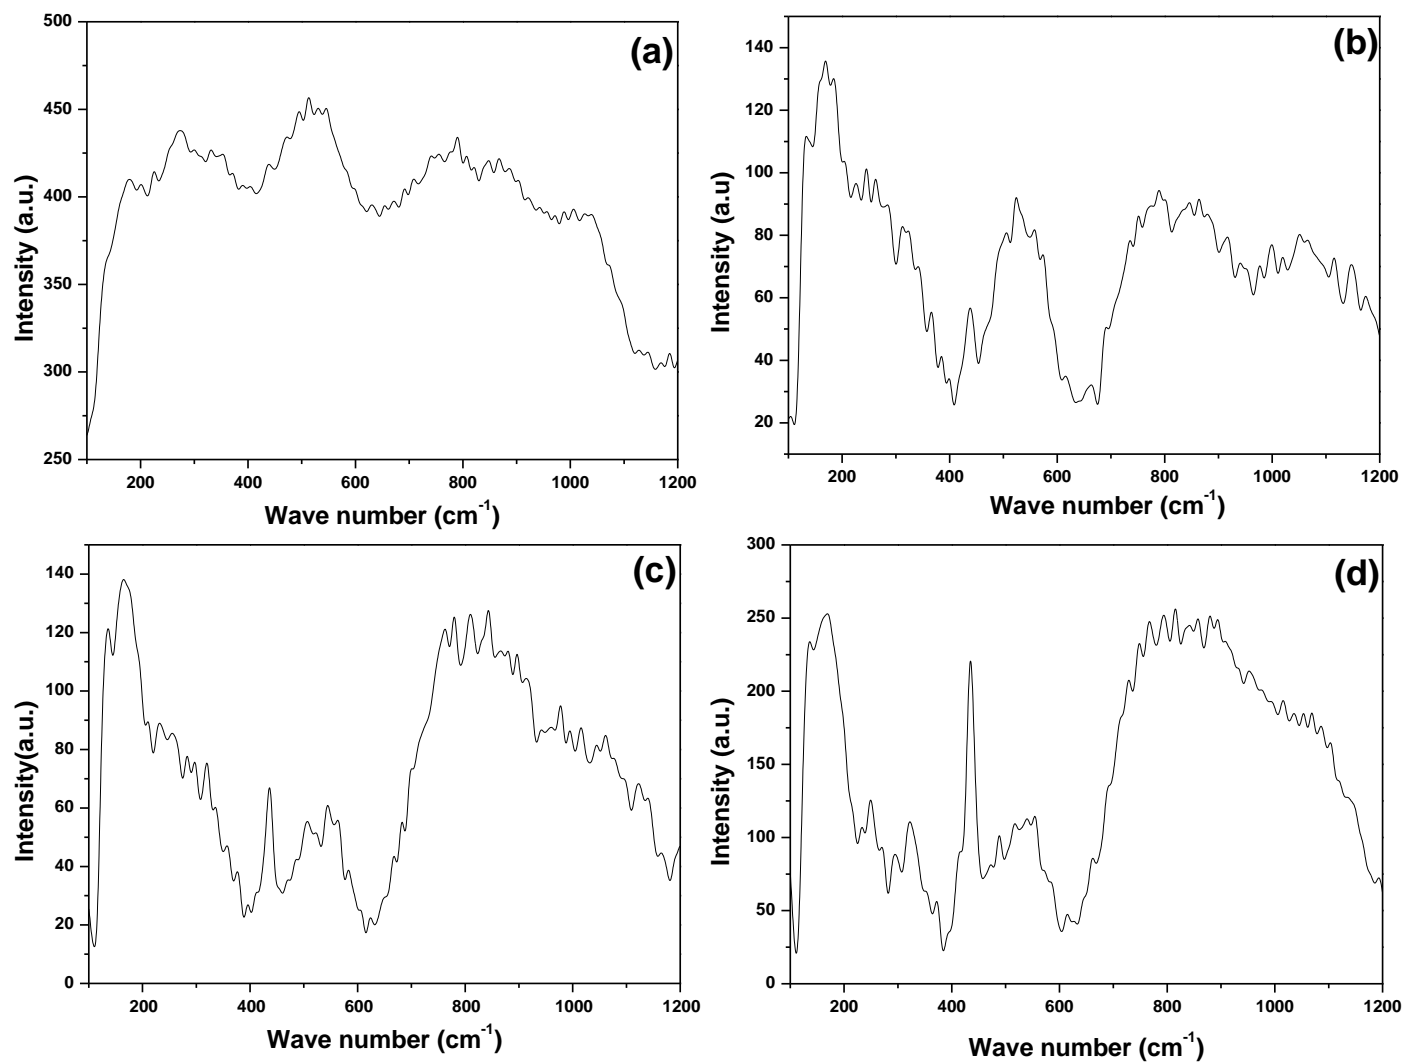

**Fig. S3** Raman spectra of Ni/ZnO nanostructure prepared using (a) 0.063, (b) 0.125, (c) 0.195 and (d) 0.25 M  $[Zn^{2+}]$ .

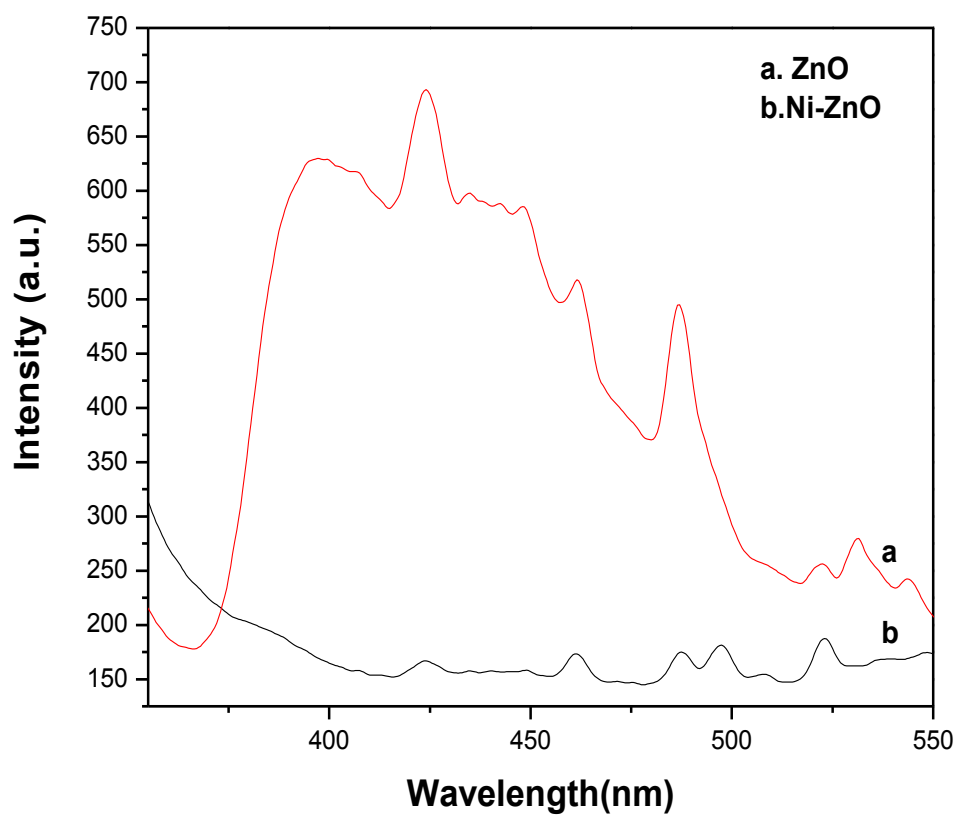

**Fig S4** Room temperature PL spectra of (a) ZnO and (b) Ni/ZnO nanostructure prepared using 0.25 M  $[\text{Zn}^{2+}]$ .
